# Supplementary material
Source: MDPI journal article supplement (https://www.mdpi.com/2073-4344/11/11/1296)

# **Chemoenzymatic stereoselective synthesis of *trans*-flavan-4-ols via lipase-catalyzed kinetic resolutions**

Martín Soto, Irene Sanz-Machín, Humberto Rodríguez-Solla\* and  
Vicente Gotor-Fernández\*

Organic and Inorganic Chemistry Department. University of Oviedo.

Avenida Julián Clavería 8, 33006 Oviedo, Spain. Phone number:

+34985103499 (H.R.-S.); +34985103454 (V.G.-F.); fax number: +34985103446.

E-mail: hrsolla@uniovi.es (H. R.-S.); vicgotfer@uniovi.es (V.G.-F.).

## **Electronic Supporting Information (Page S1 out of S22)**

### **Index**

|                                                                                                        |            |
|--------------------------------------------------------------------------------------------------------|------------|
| <b>1. HPLC conditions</b>                                                                              | <b>S1</b>  |
| <b>2. Chromatograms of <i>trans</i>-flavan-4-ols 2a-j in racemic and optically active form</b>         | <b>S2</b>  |
| <b>3. Chromatograms of <i>trans</i>-flavan-4-ol acetates 3a-j in racemic and optically active form</b> | <b>S13</b> |

## 1. HPLC conditions

**Table S1.** HPLC conditions for the chiral analyses of *trans*-flavan-4-ols **2a-j** and their corresponding acetates **3a-j**.<sup>a</sup>

| Entry | (±)-Compound                     | Column | Hexane-2-PrOH (v/v) | Retention times (min) <sup>b</sup>                                   |
|-------|----------------------------------|--------|---------------------|----------------------------------------------------------------------|
| 1     | <i>trans</i> - <b>2a</b> (H)     | IA     | 92:8                | 10.3 (2 <i>S</i> ,4 <i>R</i> ) and <b>10.9 (2<i>R</i>,4<i>S</i>)</b> |
| 2     | <i>trans</i> - <b>3a</b> (H)     | OJ-H   | 92:8                | <b>16.6 (2<i>S</i>,4<i>R</i>)</b> and 28.1 (2 <i>R</i> ,4 <i>S</i> ) |
| 3     | <i>trans</i> - <b>2b</b> (2-F)   | OJ-H   | 92:8                | 15.3 (2 <i>S</i> ,4 <i>R</i> ) and <b>19.0 (2<i>R</i>,4<i>S</i>)</b> |
| 4     | <i>trans</i> - <b>3b</b> (2-F)   | AS     | 92:8                | 5.3 (2 <i>R</i> ,4 <i>S</i> ) and <b>5.6 (2<i>S</i>,4<i>R</i>)</b>   |
| 5     | <i>trans</i> - <b>2c</b> (3-F)   | IA     | 92:8                | 9.9 (2 <i>S</i> ,4 <i>R</i> ) and <b>10.8 (2<i>R</i>,4<i>S</i>)</b>  |
| 6     | <i>trans</i> - <b>2c</b> (3-F)   | OJ-H   | 92:8                | <b>9.9 (2<i>S</i>,4<i>R</i>)</b> and 12.7 (2 <i>R</i> ,4 <i>S</i> )  |
| 7     | <i>trans</i> - <b>2d</b> (4-F)   | IA     | 92:8                | 10.5 (2 <i>S</i> ,4 <i>R</i> ) and <b>12.3 (2<i>R</i>,4<i>S</i>)</b> |
| 8     | <i>trans</i> - <b>3d</b> (4-F)   | OJ-H   | 92:8                | <b>13.5 (2<i>S</i>,4<i>R</i>)</b> and 16.0 (2 <i>R</i> ,4 <i>S</i> ) |
| 9     | <i>trans</i> - <b>2e</b> (4-Cl)  | IA     | 92:8                | 11.1 (2 <i>S</i> ,4 <i>R</i> ) and <b>13.1 (2<i>R</i>,4<i>S</i>)</b> |
| 10    | <i>trans</i> - <b>3e</b> (4-Cl)  | AS     | 92:8                | 5.7 (2 <i>R</i> ,4 <i>S</i> ) and <b>6.2 (2<i>S</i>,4<i>R</i>)</b>   |
| 11    | <i>trans</i> - <b>2f</b> (4-Br)  | IA     | 92:8                | 11.6 (2 <i>S</i> ,4 <i>R</i> ) and <b>13.8 (2<i>R</i>,4<i>S</i>)</b> |
| 12    | <i>trans</i> - <b>3f</b> (4-Br)  | OD     | 98:2                | 8.8 (2 <i>R</i> ,4 <i>S</i> ) and <b>9.6 (2<i>S</i>,4<i>R</i>)</b>   |
| 13    | <i>trans</i> - <b>2g</b> (2-OMe) | OJ-H   | 92:8                | 17.7 (2 <i>S</i> ,4 <i>R</i> ) and <b>20.0 (2<i>R</i>,4<i>S</i>)</b> |
| 14    | <i>trans</i> - <b>3g</b> (2-OMe) | OJ-H   | 92:8                | 13.4 (2 <i>R</i> ,4 <i>S</i> ) and <b>14.6 (2<i>S</i>,4<i>R</i>)</b> |
| 15    | <i>trans</i> - <b>2h</b> (3-OMe) | OJ-H   | 92:8                | 26.0 (2 <i>S</i> ,4 <i>R</i> ) and <b>28.8 (2<i>R</i>,4<i>S</i>)</b> |
| 16    | <i>trans</i> - <b>3h</b> (3-OMe) | OJ-H   | 92:8                | <b>16.6 (2<i>S</i>,4<i>R</i>)</b> and 23.2 (2 <i>R</i> ,4 <i>S</i> ) |
| 17    | <i>trans</i> - <b>2i</b> (4-OMe) | IA     | 92:8                | 15.0 (2 <i>S</i> ,4 <i>R</i> ) and <b>16.6 (2<i>R</i>,4<i>S</i>)</b> |
| 18    | <i>trans</i> - <b>3i</b> (4-OMe) | IB     | 92:8                | <b>6.5 (2<i>S</i>,4<i>R</i>)</b> and 6.8 (2 <i>R</i> ,4 <i>S</i> )   |
| 19    | <i>trans</i> - <b>2j</b> (4-Me)  | IA     | 92:8                | 10.4 (2 <i>S</i> ,4 <i>R</i> ) and <b>11.4 (2<i>R</i>,4<i>S</i>)</b> |
| 20    | <i>trans</i> - <b>3j</b> (4-Me)  | OD     | 98:2                | <b>7.1 (2<i>S</i>,4<i>R</i>)</b> and 7.9 (2 <i>R</i> ,4 <i>S</i> )   |

<sup>a</sup> The temperature column was 30 °C and the flow 0.8 mL/min. Analyses were performed at 210 and 214 nm wavelengths.

<sup>b</sup> Major enantiomer of the enzymatic reactions appear in bold font.

## 2. Chromatograms of *trans*-flavan-4-ols 2a-j in racemic and optically active form

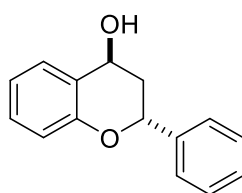

(2R\*,4S\*)-*trans*-2a

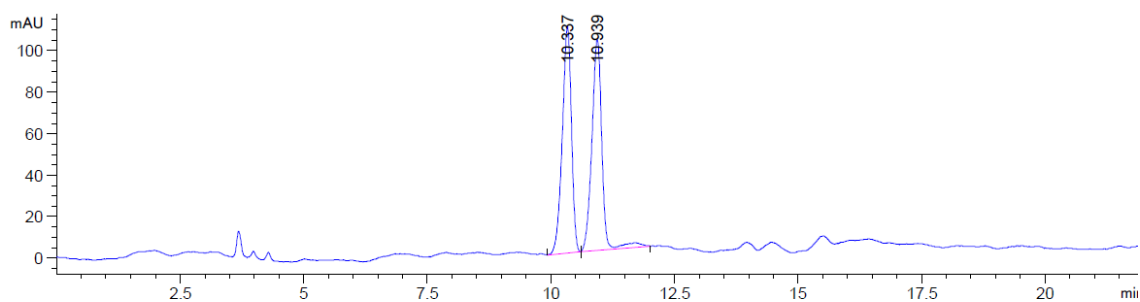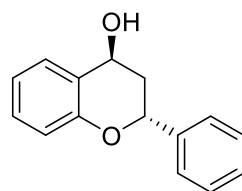

(2R,4S)-*trans*-2a

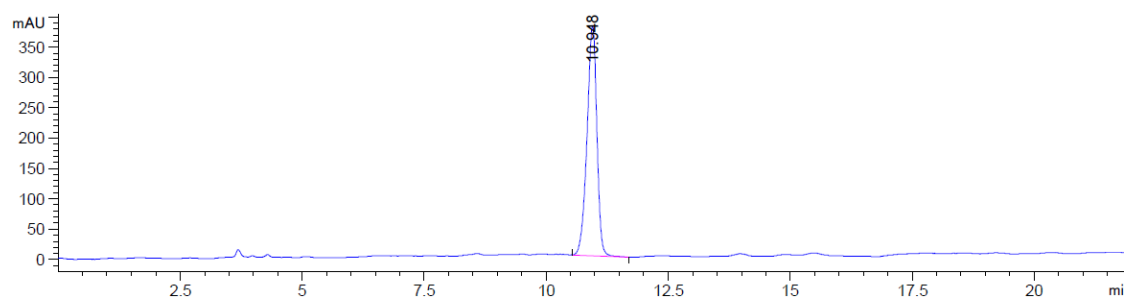

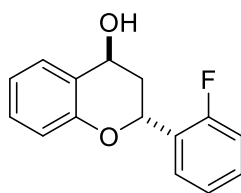

**(2*R*\*,4*S*\*)-trans-2b**

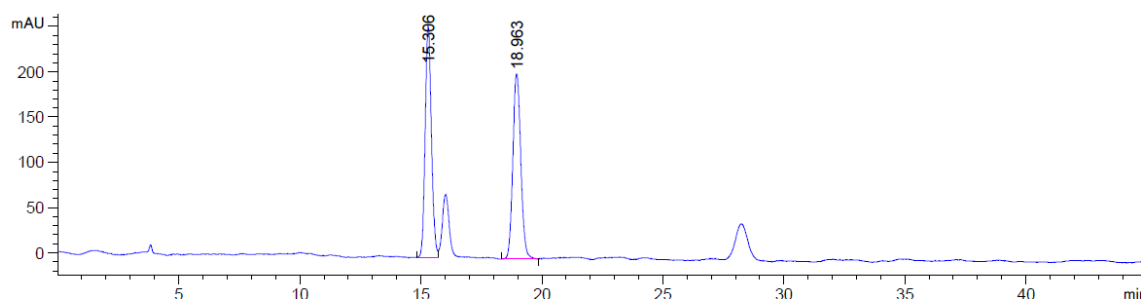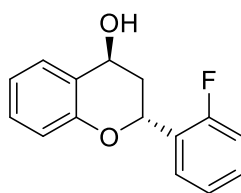

**(2*R*,4*S*)-trans-2b**

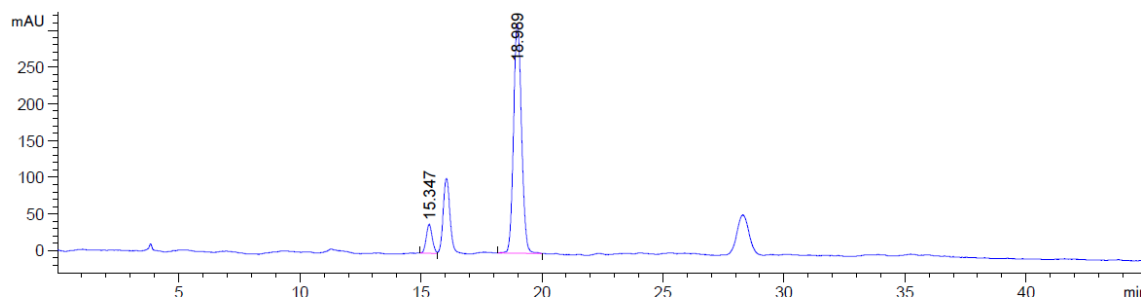

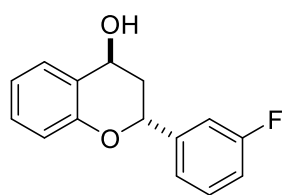

**(2*R*\*,4*S*\*)-trans-2c**

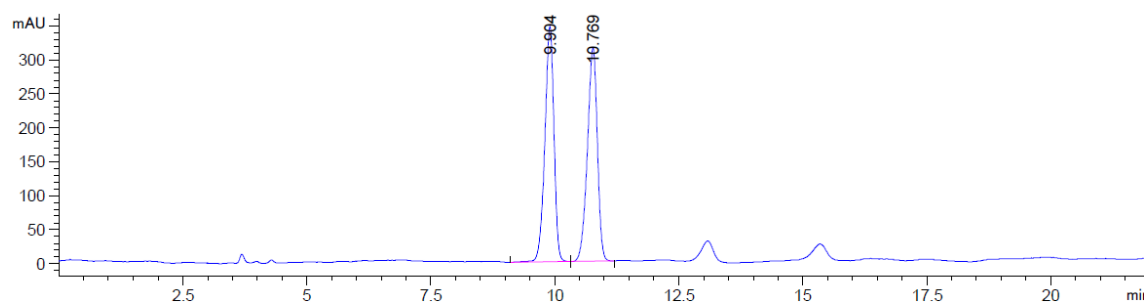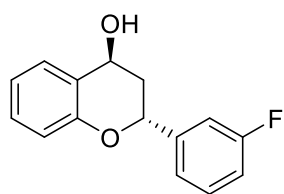

**(2*R*,4*S*)-trans-2c**

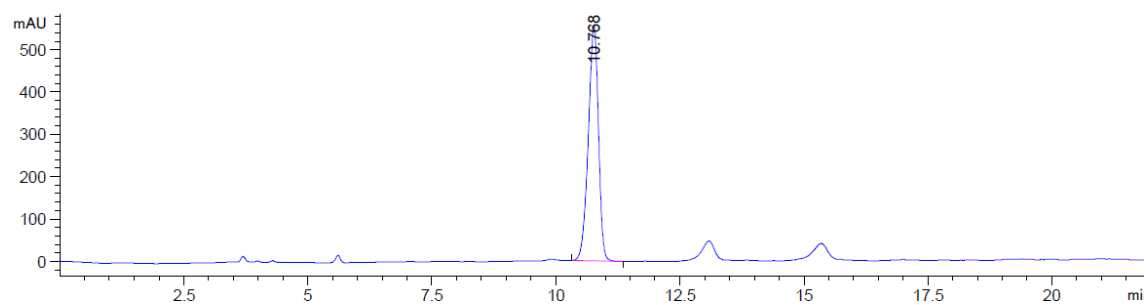

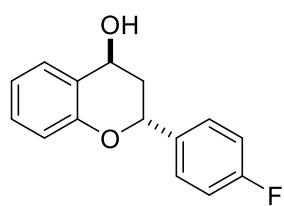

**(2*R*\*,4*S*\*)-trans-2d**

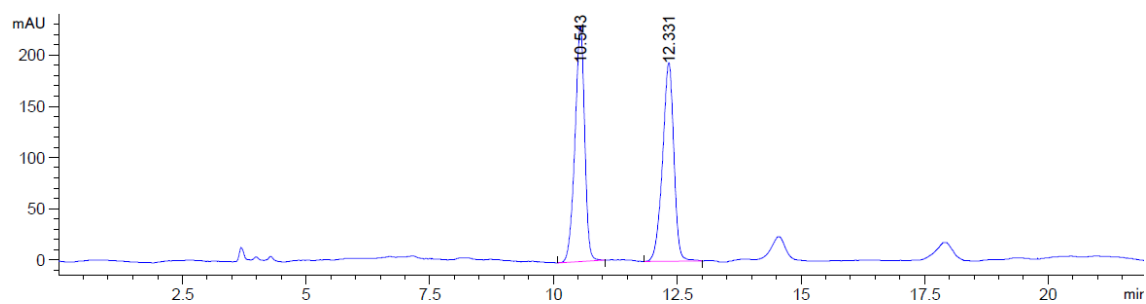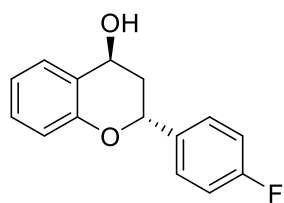

**(2*R*,4*S*)-trans-2d**

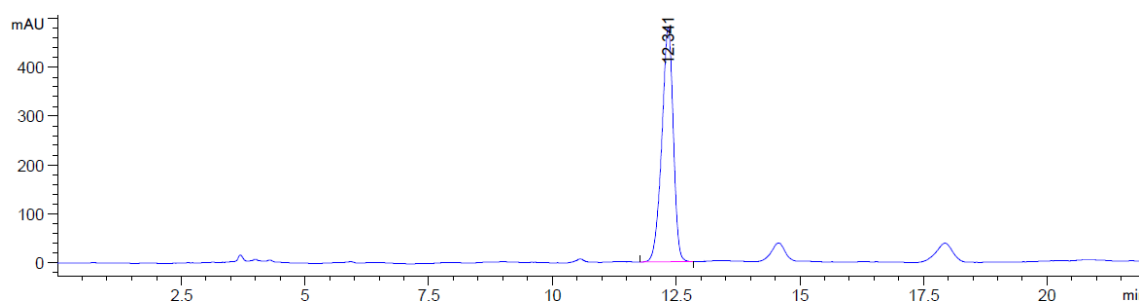

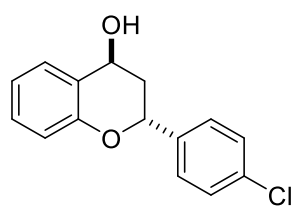

**(2*R*<sup>\*</sup>,4*S*<sup>\*</sup>)-trans-2e**

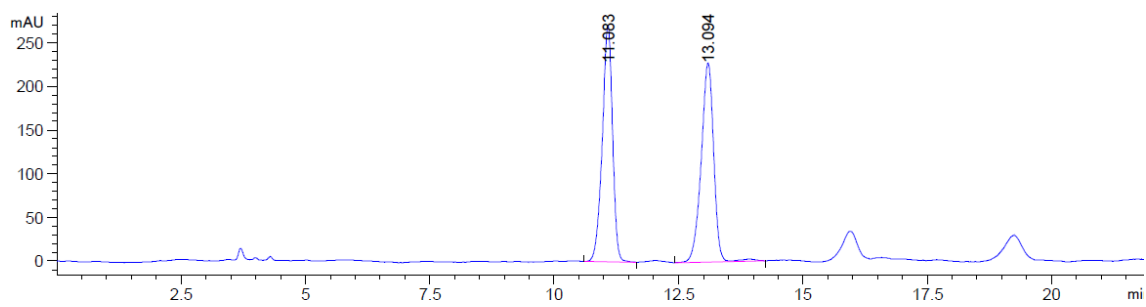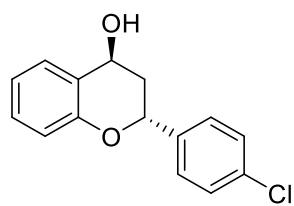

**(2*R*,4*S*)-trans-2e**

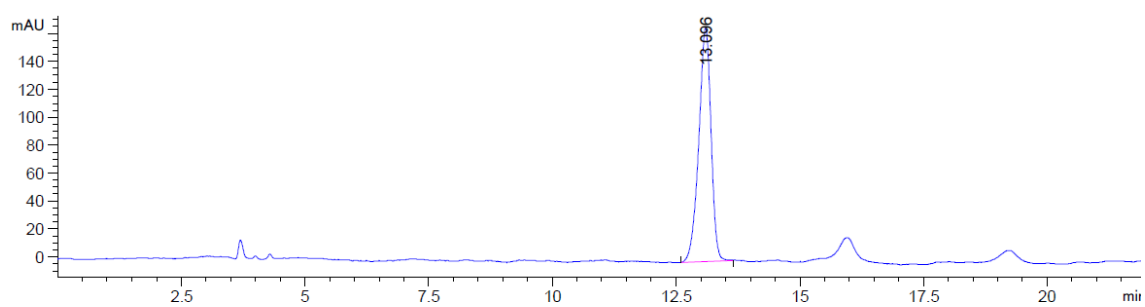

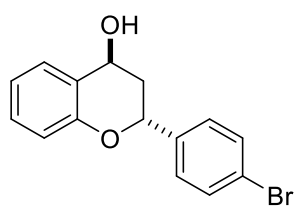

**(2*R*<sup>\*</sup>,4*S*<sup>\*</sup>)-trans-2f**

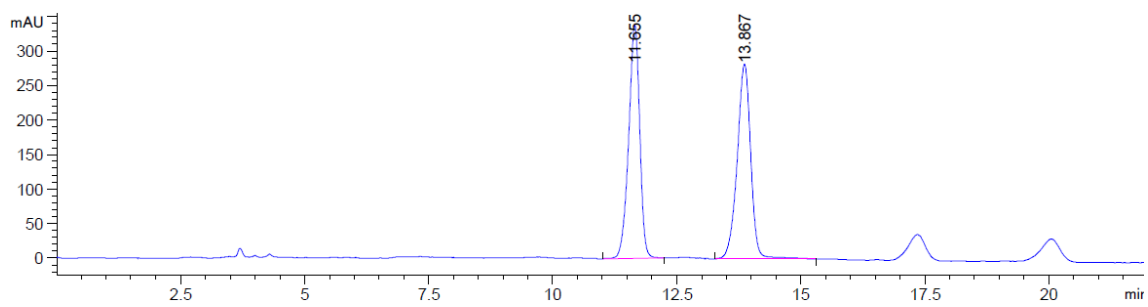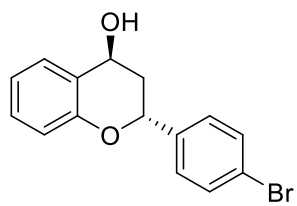

**(2*R*,4*S*)-trans-2f**

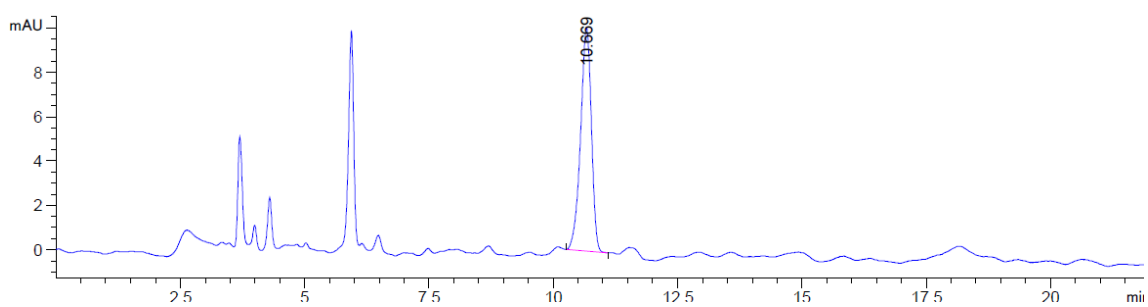



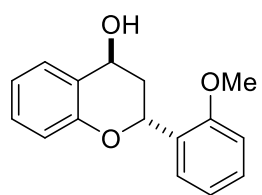

**(2*R*\*,4*S*\*)-trans-2g**

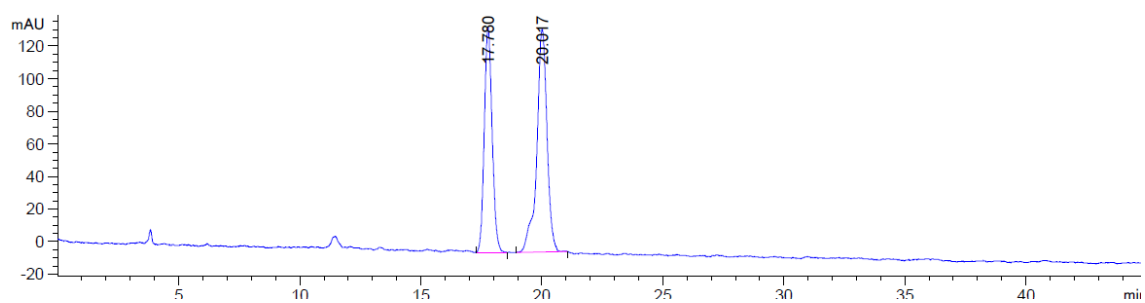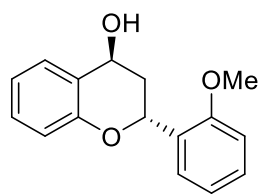

**(2*R*,4*S*)-trans-2g**

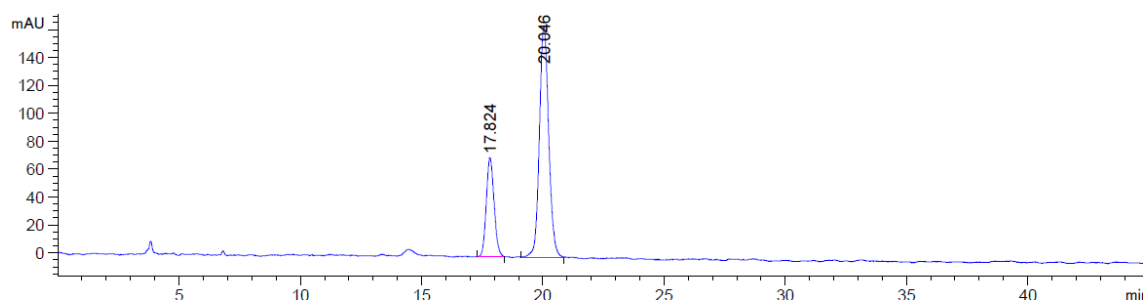

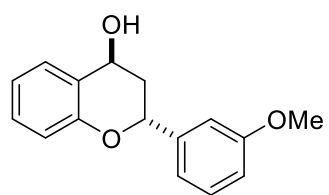

*(2R\*,4S\*)-trans-2h*

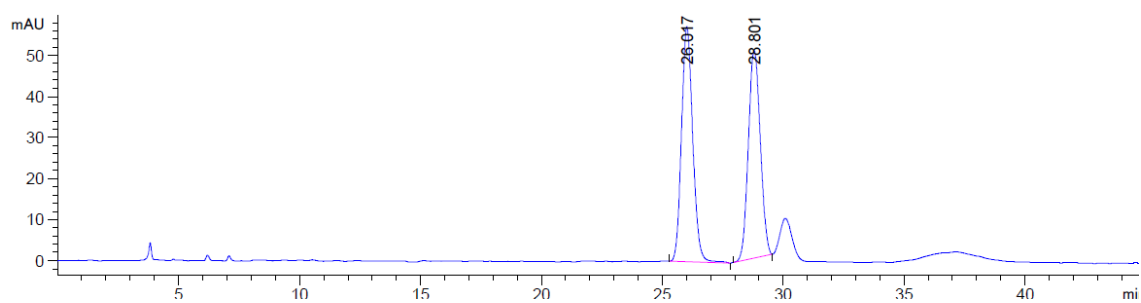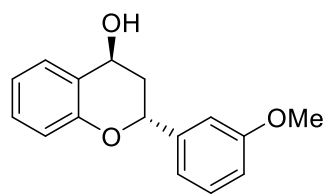

*(2R,4S)-trans-2h*

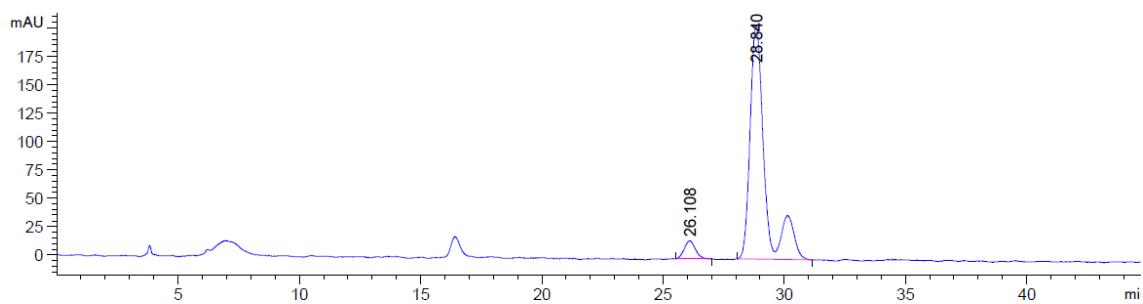

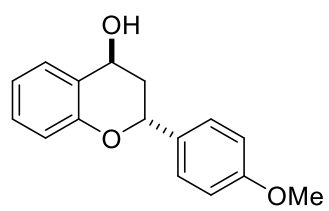

*(2R\*,4S\*)-trans-2i*

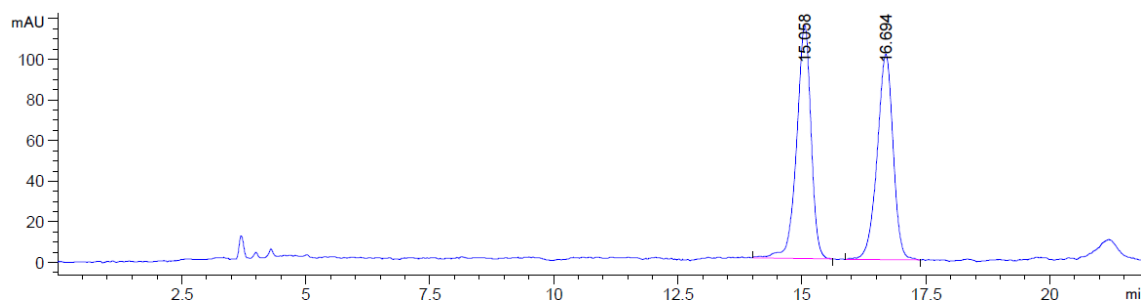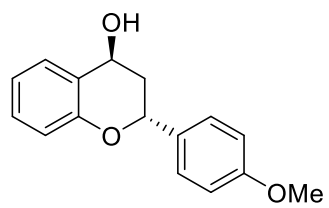

*(2R,4S)-trans-2i*

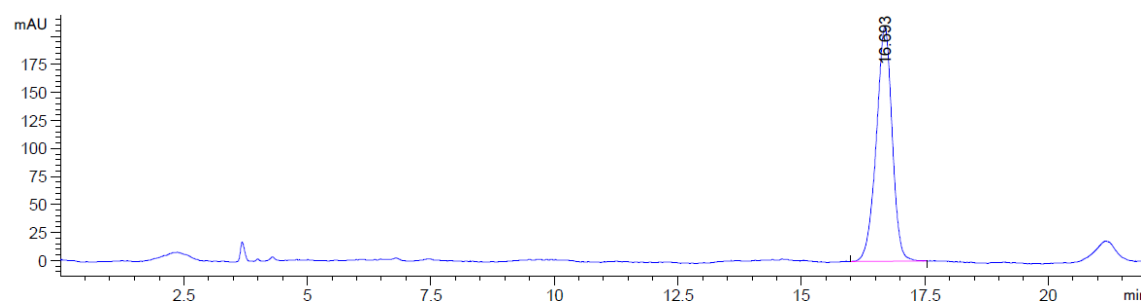

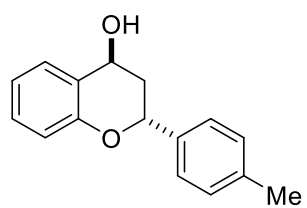

**(2*R*<sup>\*</sup>,4*S*<sup>\*</sup>)-trans-2j**

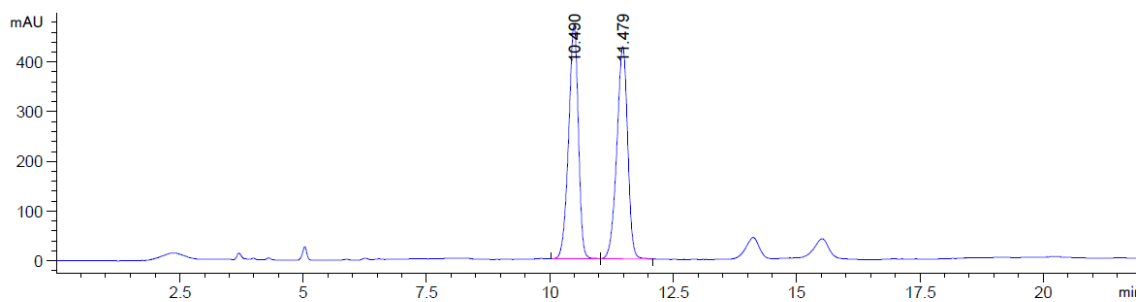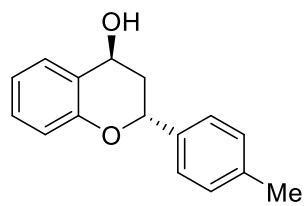

**(2*R*,4*S*)-trans-2j**

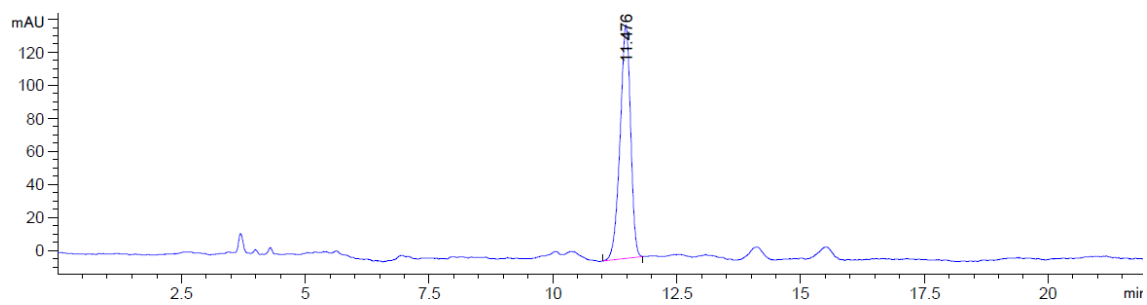

### 3. Chromatograms of *trans*-flavan-4-ol acetates 3a-j in racemic and optically active form

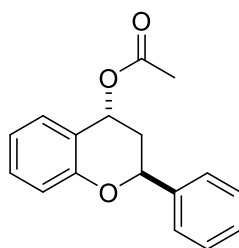

(2S\*,4R\*)-*trans*-3a

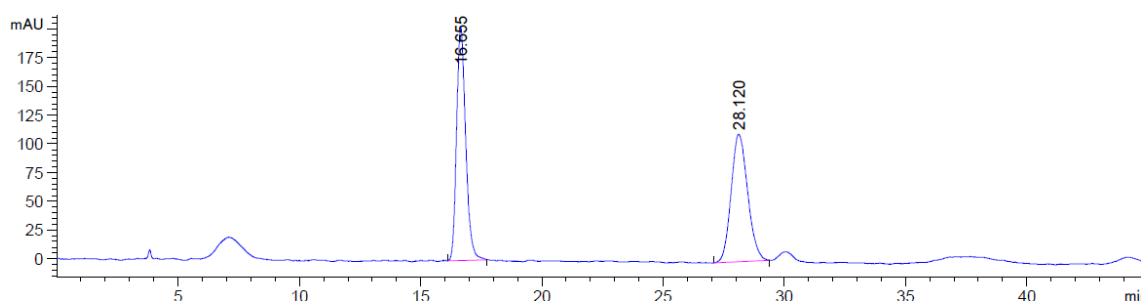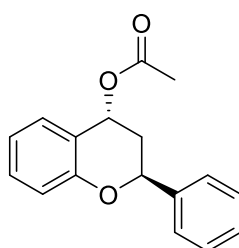

(2S,4R)-*trans*-3a

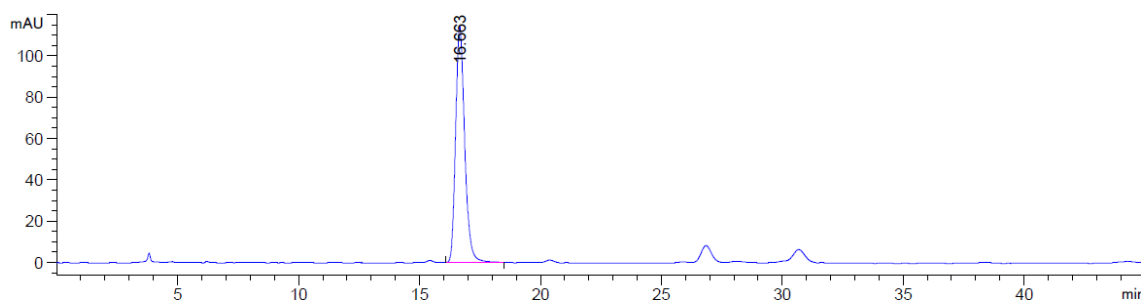

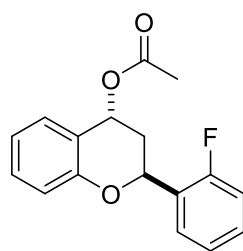

**(2S\*,4R\*)-trans-3b**

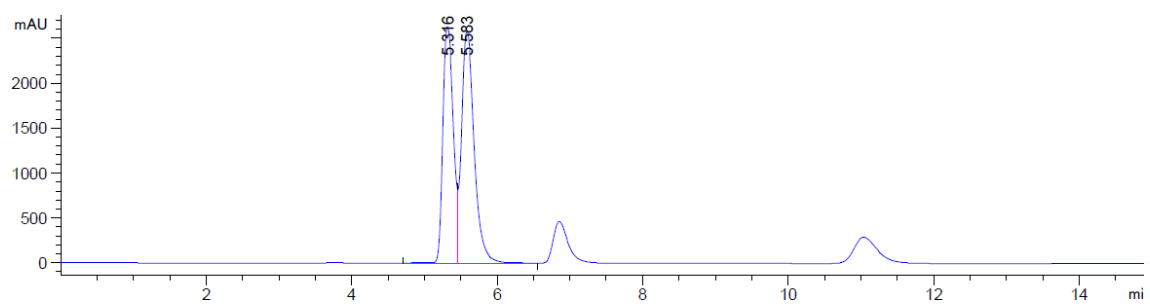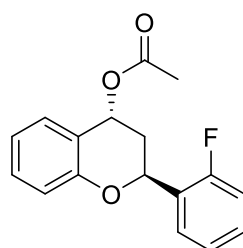

**(2S,4R)-trans-3b**

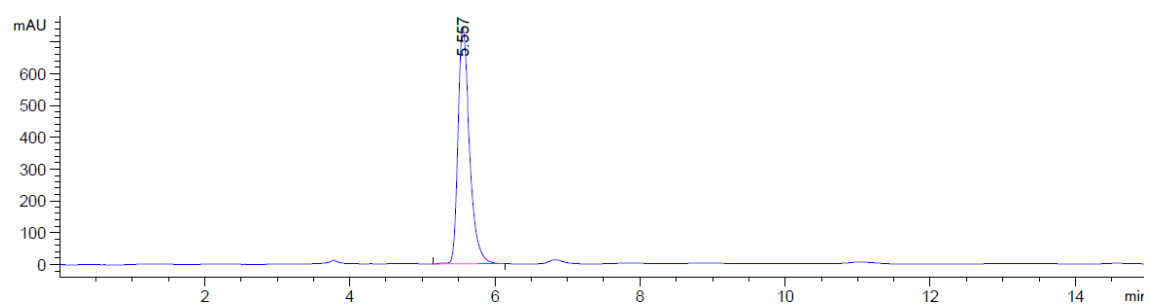

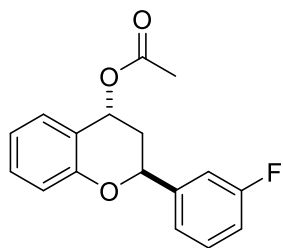

*(2S\*,4R\*)-trans-3c*

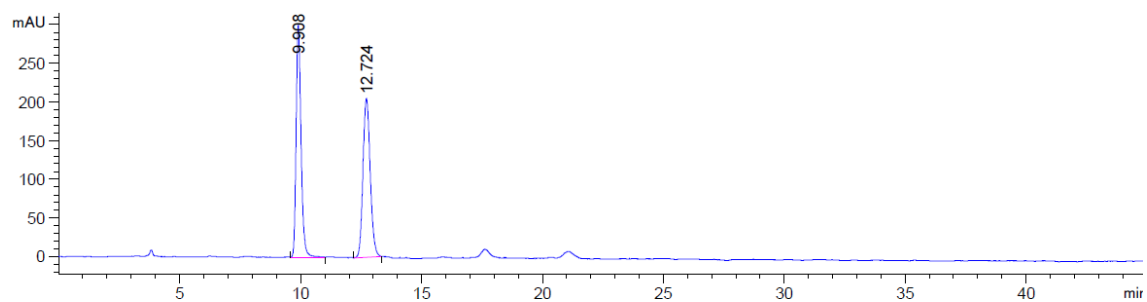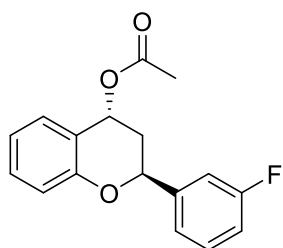

*(2S,4R)-trans-3c*

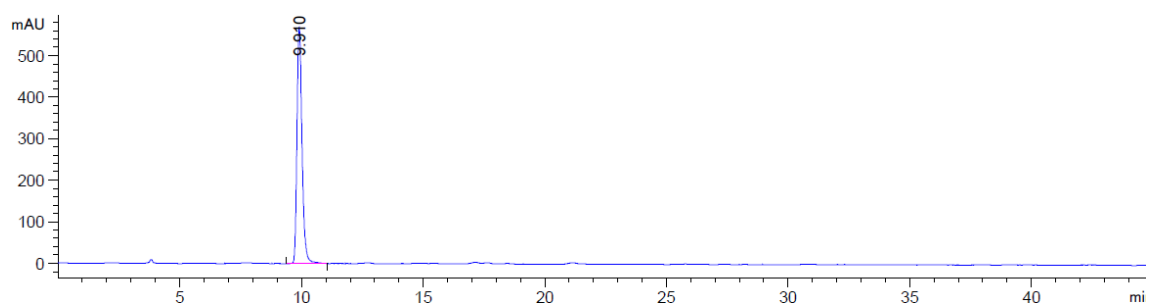

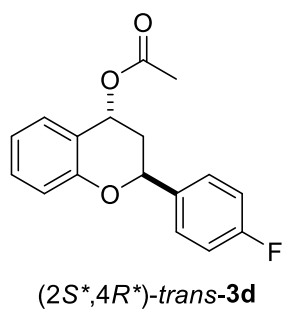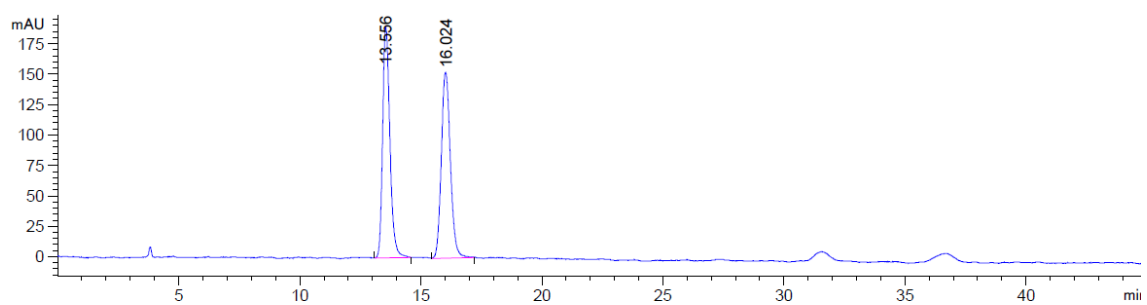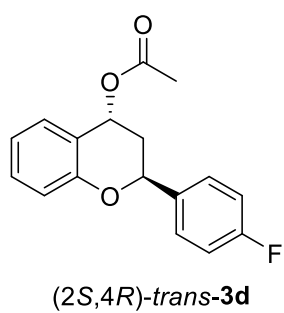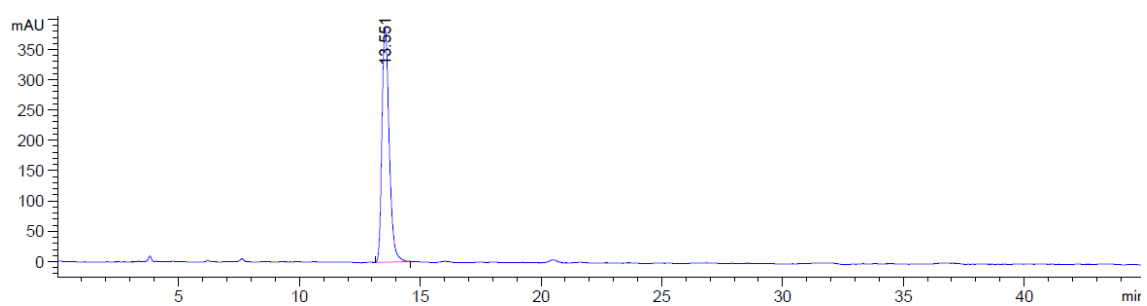



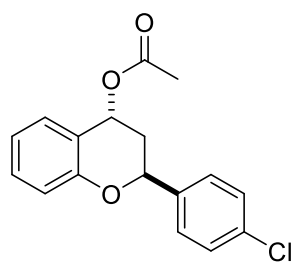

**(2*S*\*,4*R*\*)-trans-3e**

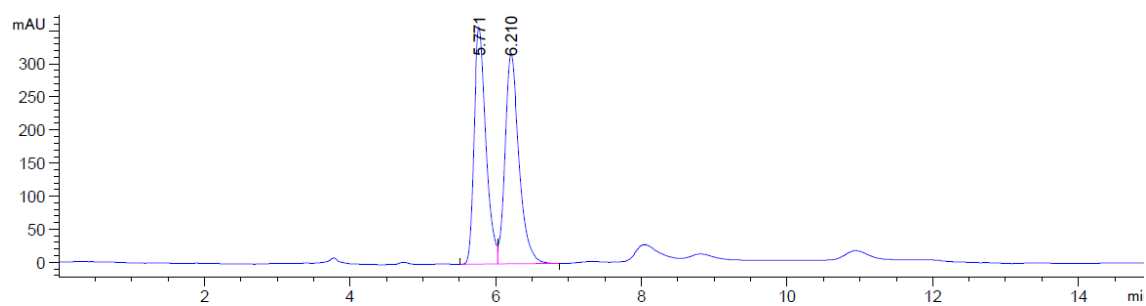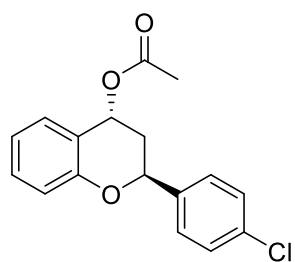

**(2*S*,4*R*)-trans-3e**

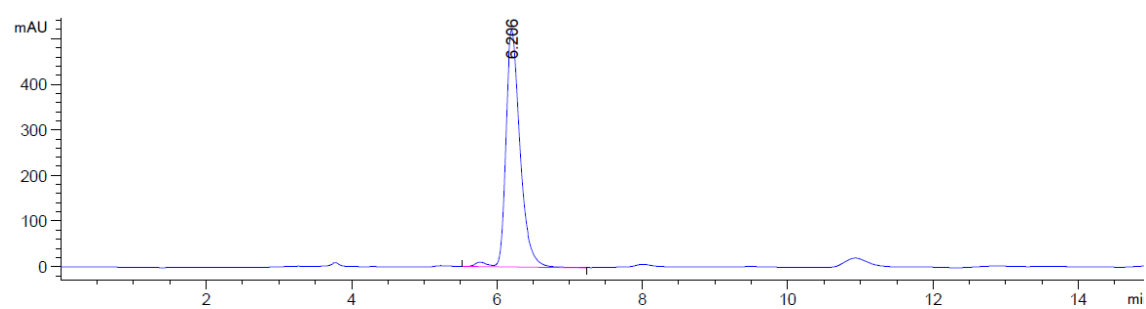

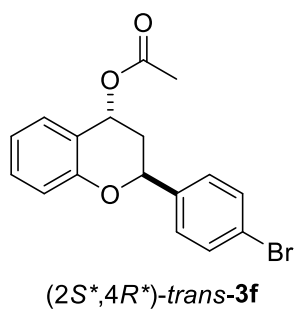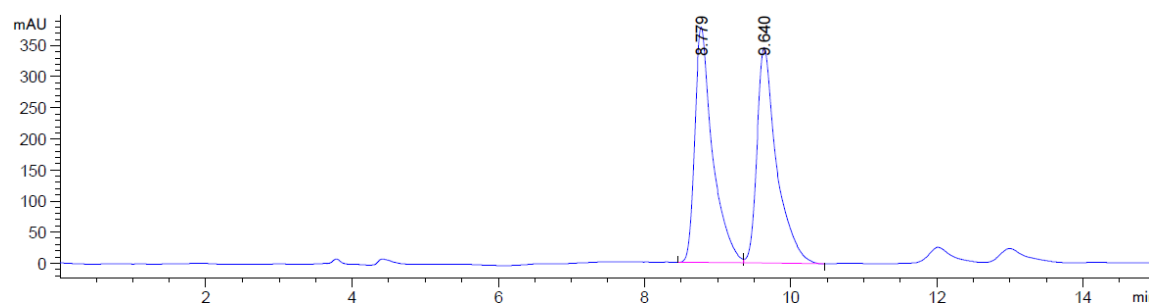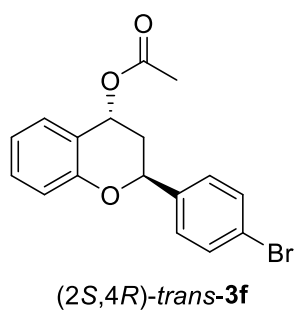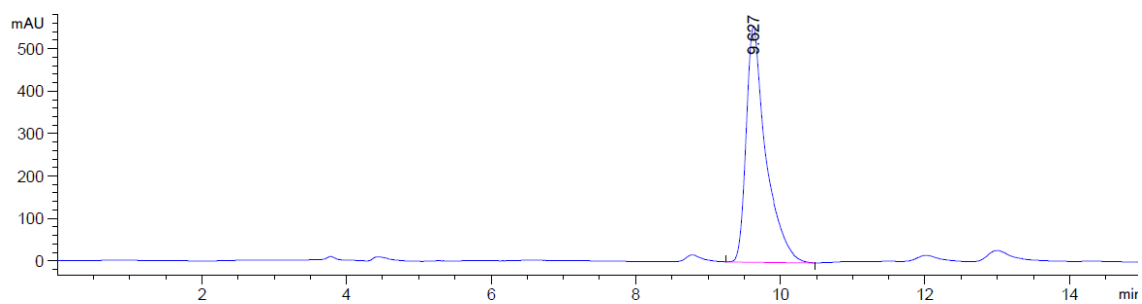

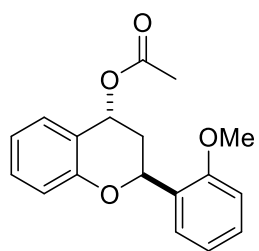

**(2*S*<sup>\*</sup>,4*R*<sup>\*</sup>)-trans-3g**

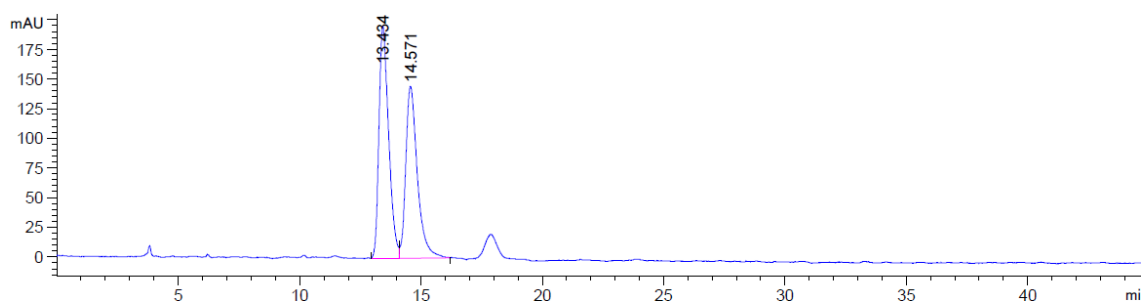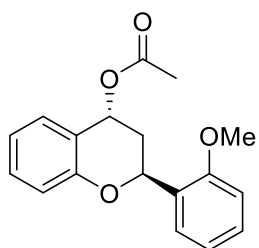

**(2*S*,4*R*)-trans-3g**

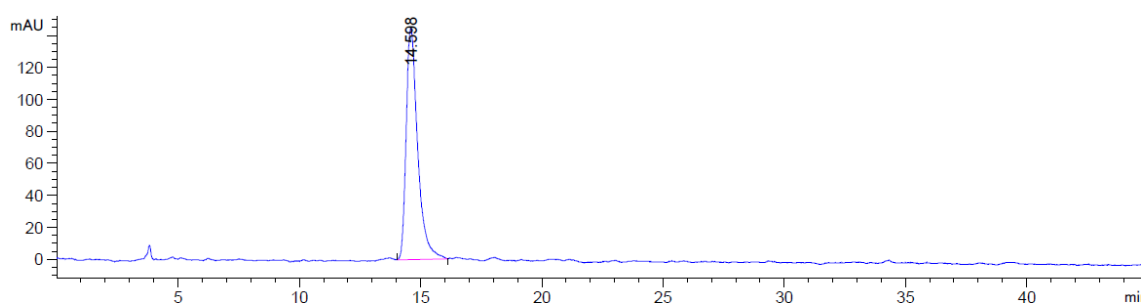

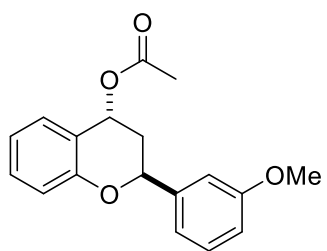

*(2S\*,4R\*)-trans-3h*

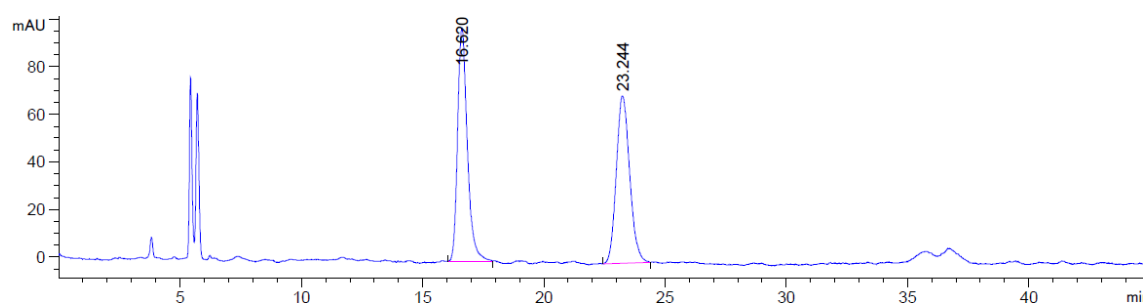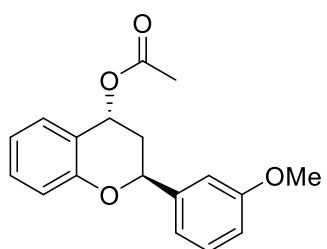

*(2S,4R)-trans-3h*

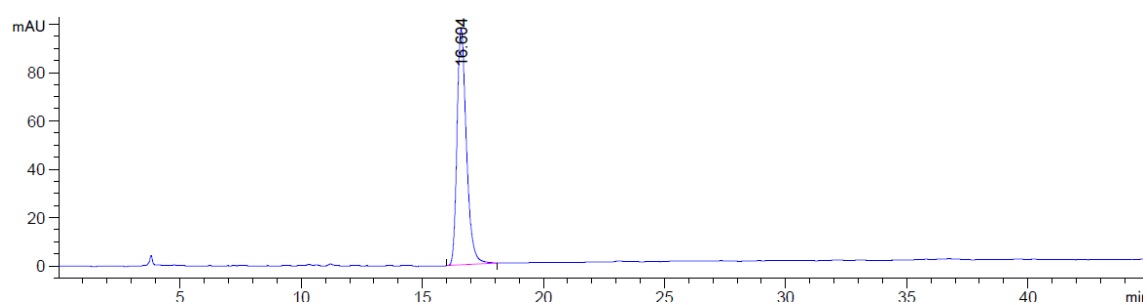

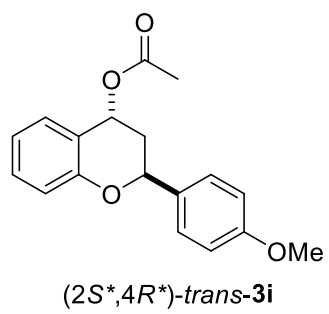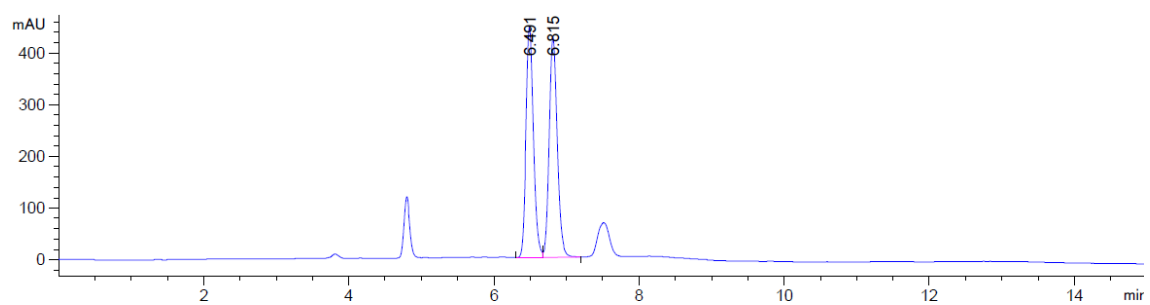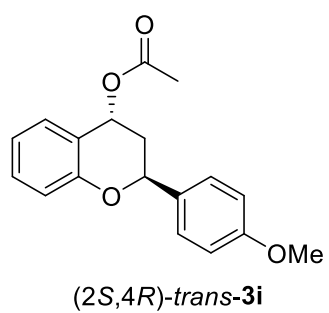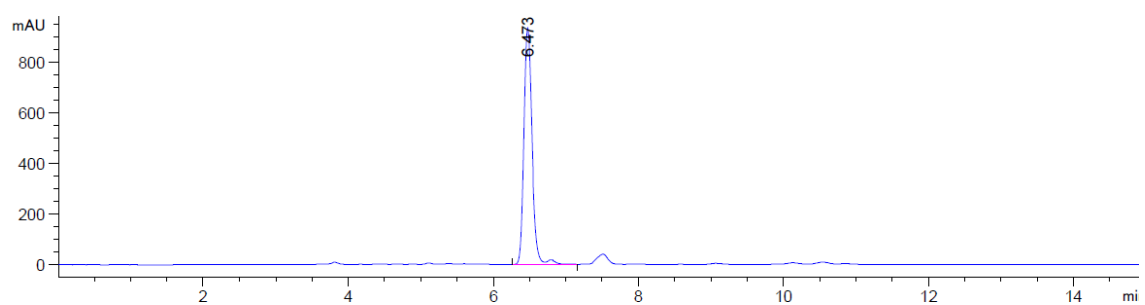

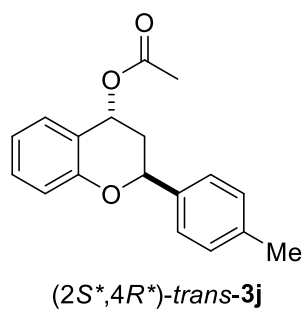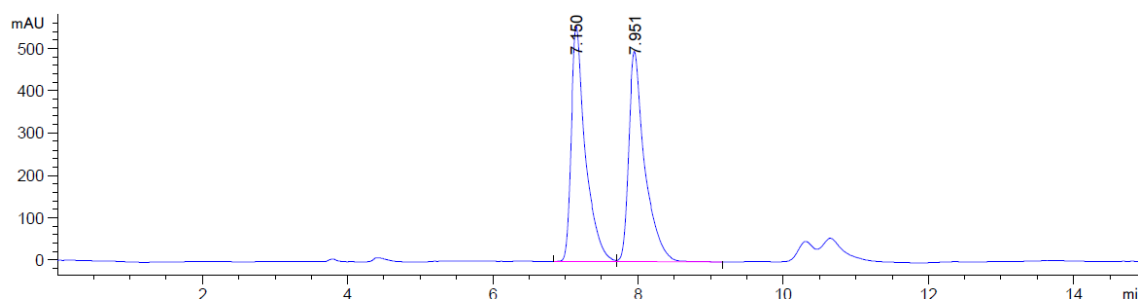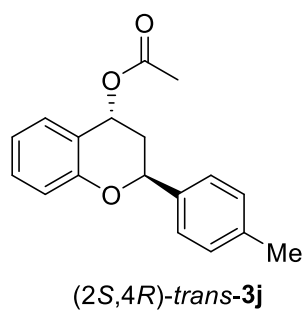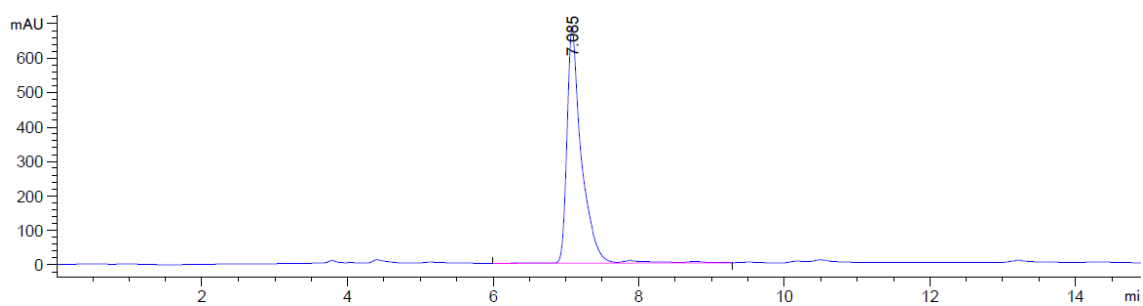

Supplement: s1 [file s1]
